# Supplementary material for: Chalcogenide and pnictide nanocrystals from the silylative deoxygenation of metal oxides
Source: Royal Society of Chemistry journal article supplement (doi:10.1039/c7ta02581e), 2017-01-01
Supplement: c7ta02581e1.pdf [file c7ta02581e1.pdf]

**Supporting Information for:**

**Chalcogenide and Pnictide Nanocrystals from the Silylative  
Deoxygenation of Metal Oxides**

Chia-Cheng Lin,<sup>1</sup> Shannon J. Tan<sup>1</sup> and Javier Vela<sup>1,2,\*</sup>

<sup>1</sup>Department of Chemistry, Iowa State University, and <sup>2</sup>Ames Laboratory, Ames, Iowa, 50011

**Corresponding Author**

\* vela@iastate.edu

**Table S1.** Optoelectronic properties of select Ni and Co chalcogenides and pnictides.

| Material                            | Character                                                            |
|-------------------------------------|----------------------------------------------------------------------|
| NiO                                 | Semiconducting (4.0 eV) <sup>1</sup>                                 |
| Ni <sub>3</sub> S <sub>2</sub>      | Metallic                                                             |
| Ni <sub>5</sub> Se <sub>5</sub>     | unknown                                                              |
| Ni <sub>2</sub> P                   | Metallic                                                             |
| CoO                                 | Semiconducting (3.4, <sup>i</sup> 4.5 eV <sup>d</sup> ) <sup>2</sup> |
| Co <sub>3</sub> O <sub>4</sub>      | Semiconducting (2.13, 3.95 eV) <sup>3</sup>                          |
| Co <sub>9</sub> S <sub>8</sub>      | Metallic                                                             |
| Co <sub>9</sub> S <sub>8</sub>      | Metallic                                                             |
| Co <sub>3</sub> Se <sub>4</sub>     | unknown                                                              |
| CoP                                 | Metallic                                                             |
| Co <sub>2</sub> P                   | Metallic                                                             |
| NiCo <sub>2</sub> O <sub>4</sub>    | Semiconducting (2.06, 3.63 eV) <sup>4</sup>                          |
| (Ni/Co) <sub>9</sub> S <sub>8</sub> | unknown                                                              |

<sup>i</sup> = indirect, <sup>d</sup> = direct

<sup>1</sup> J.Y. Corey, Chem. Rev. 111 (2011) 863.

<sup>2</sup> C. Rödl, F. Fuchs, J. Furthmüller, F. Bechstedt, Phys. Rev. B 79 (2009) 235114-1.

<sup>3</sup> R. Xu, H.C. Zeng, Langmuir 20 (2004) 9780.

<sup>4</sup> B. Cui, H. Lin, Y.Z. Liu, J.B. Li, P. Sun, X.C. Zhao, C.J. Liu, J. Phys. Chem. C 113 (2009) 14083.

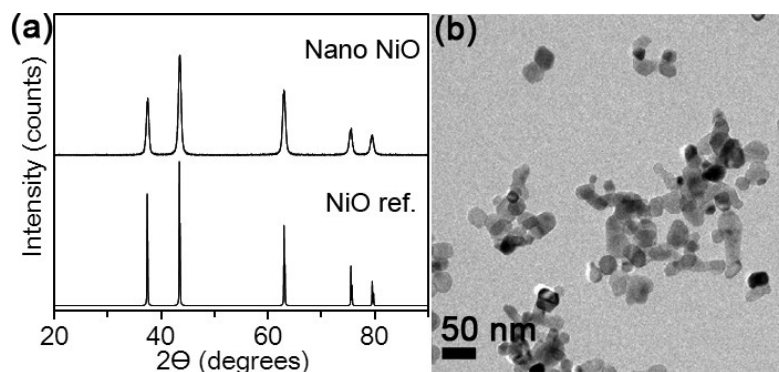

**Figure S1.** Powder XRD data for NiO nanocrystals (Scherrer:  $14.1 \pm 0.4$  nm), bulk NiO reference (a) and representative TEM image of NiO nanocrystals ( $18 \pm 4$  nm) (b).

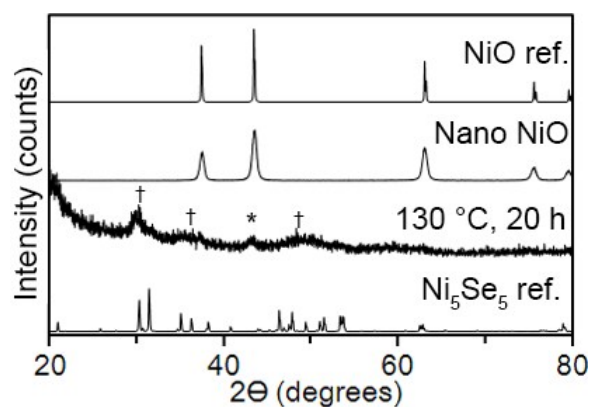

**Figure S2.** Powder XRD patterns of NiO nanocrystals and their silylative deoxygenation product upon reaction with TMS<sub>2</sub>Se. Reported XRD patterns for bulk rock salt NiO(\*) and Ni<sub>5</sub>Se<sub>5</sub> (\$) are shown for comparison.

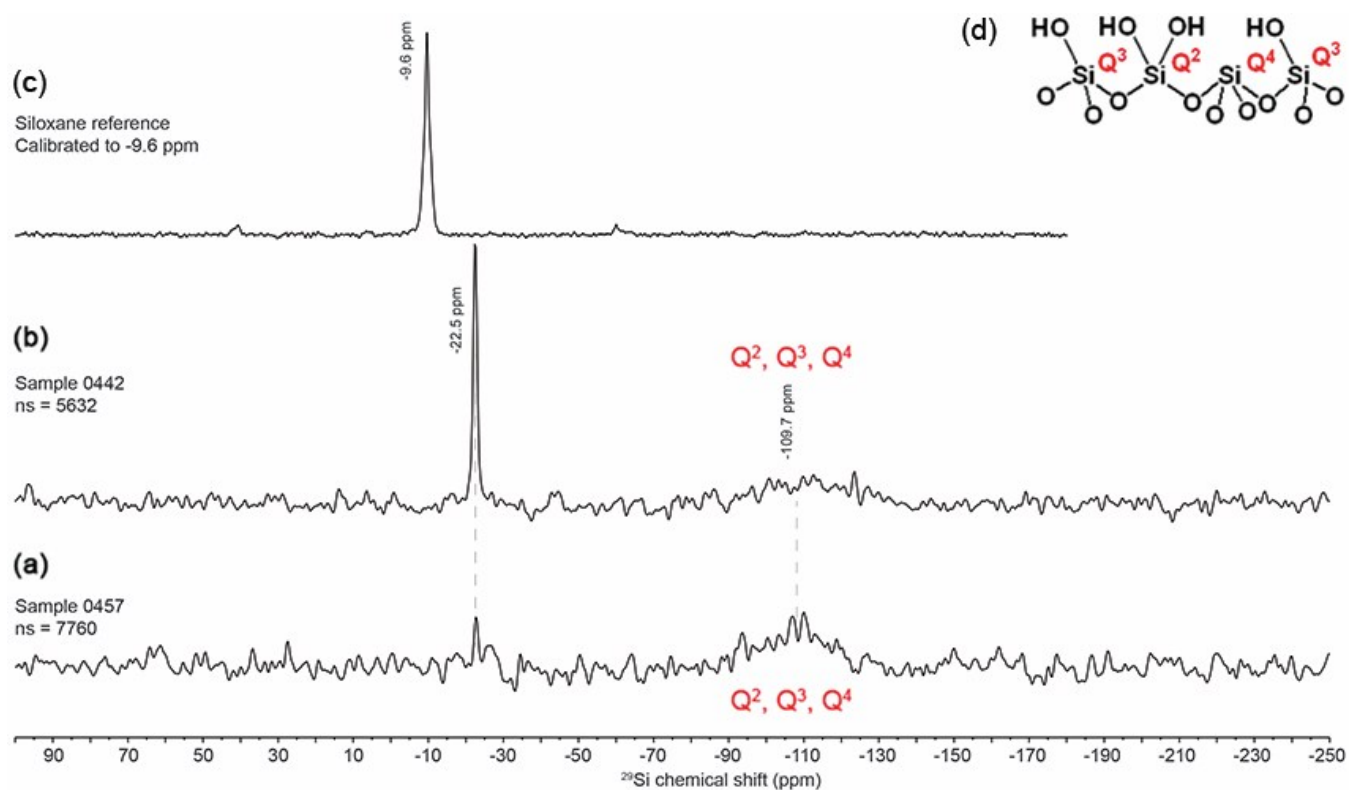

**Figure S3.** DP-MAS  $^{29}\text{Si}$  NMR spectra of  $\text{Co}_9\text{S}_8$  (a) and  $\text{Ni}_3\text{S}_2$  (b). The sharp peak at *ca.* -25 ppm is associated with residual silicone grease.

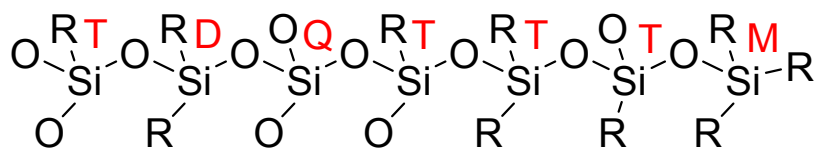

**Figure S4.** M, D, T and Q silicons in  $^{29}\text{Si}$  NMR.

| Table S2. Bond dissociation energies. |              |
|---------------------------------------|--------------|
| Si-O                                  | 800 kJ / mol |
| Si-C                                  | 447 kJ / mol |
| C-H                                   | 338 kJ / mol |

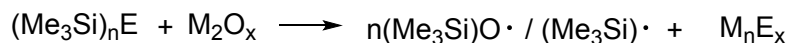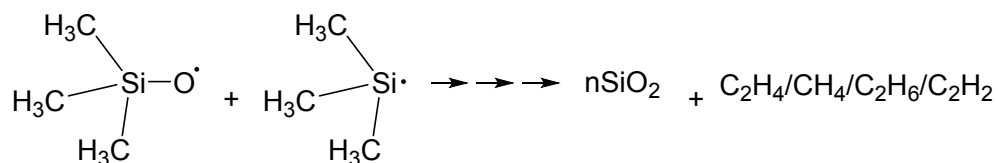

**Scheme S1.** Possible decomposition mechanism of excess trimethylsilyl reagents. See: A. Sonnenfeld, T. M. Tun, L. Zajickova, K. V. Kozlov, H.-E. Wagner, J. F. Behnke, R. Hippler, *Plasmas and Polymers* 6 (2002) 237.

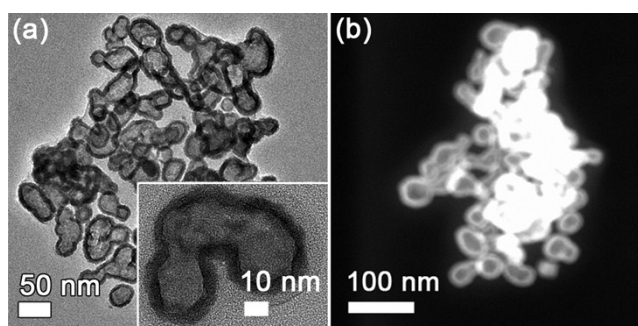

**Figure S5.** Representative bright field TEM (a) and HAADF-STEM (b) images of  $\text{Ni}_5\text{Se}_5$  nanocrystals produced by silylative deoxygenation of  $\text{NiO}$  with  $\text{TMS}_2\text{Se}$ . Inset shows a magnified image of one hollow particle.

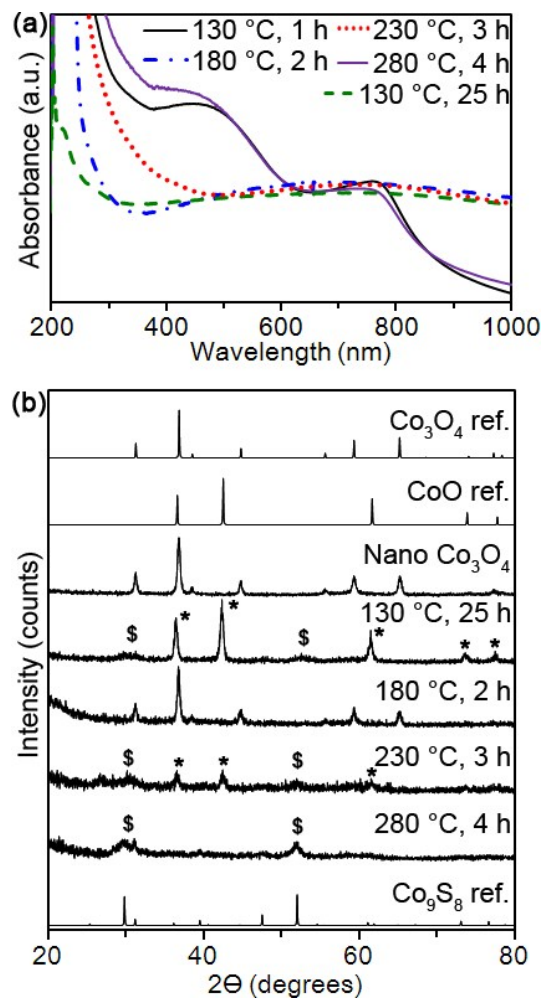

**Figure S6.** Solution-phase optical density spectra of aliquots during the reaction (a) and powder XRD data of  $\text{Co}_3\text{O}_4$  nanocrystals, products of the silylative deoxygenation of  $\text{Co}_3\text{O}_4$  with  $\text{TMS}_2\text{S}$  and bulk references (b) (\* =  $\text{CoO}$ , \$ =  $\text{Co}_9\text{S}_8$ ).

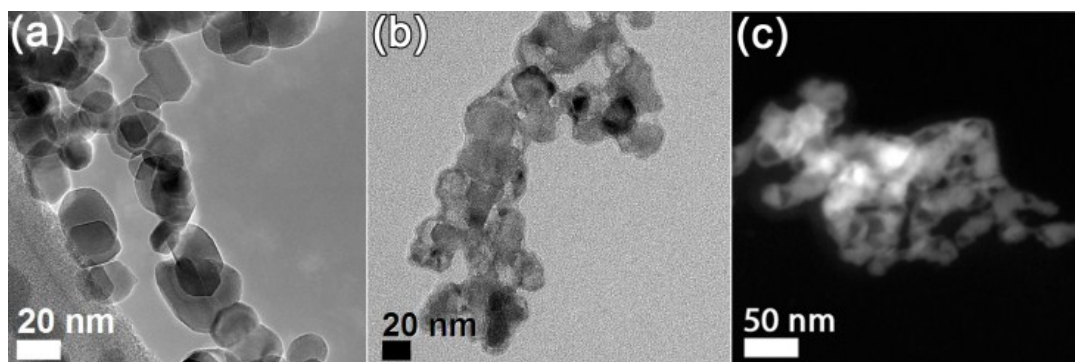

**Figure S7.** Representative TEM images of  $\text{Co}_3\text{O}_4$  nanocrystals (a), bright field image (b) and HAADF-STEM image (c) of product after 25 h of silylative deoxygenation of  $\text{Co}_3\text{O}_4$  with  $\text{TMS}_2\text{S}$ .

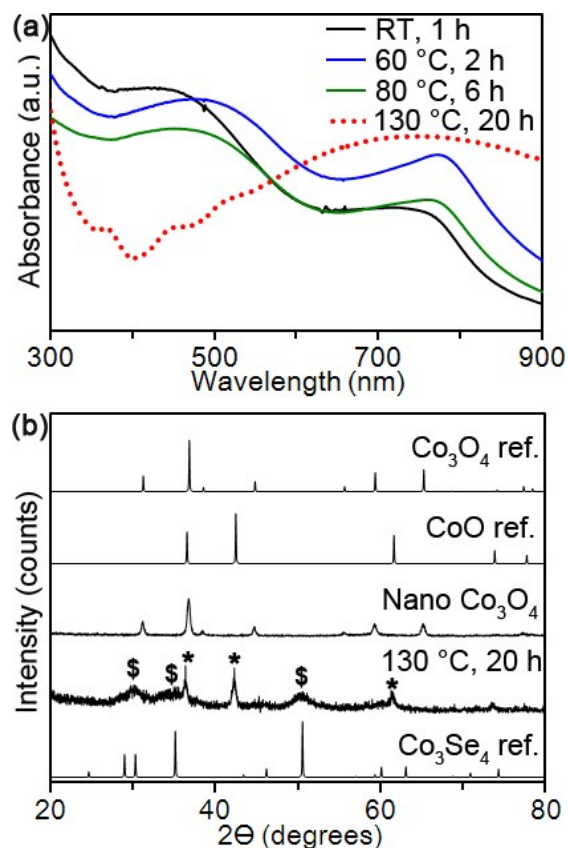

**Figure S8.** Solution-phase optical density spectra of aliquots during the silylative deoxygenation of  $\text{Co}_3\text{O}_4$  with  $\text{TMS}_2\text{Se}$  reaction (a) and wide angle powder XRD data for  $\text{Co}_3\text{O}_4$  nanocrystals, product after 20 h of reaction and bulk references (b) (\* = CoO, \$ = MgAl<sub>2</sub>O<sub>4</sub> spinel-type  $\text{Co}_3\text{Se}_4$ ).

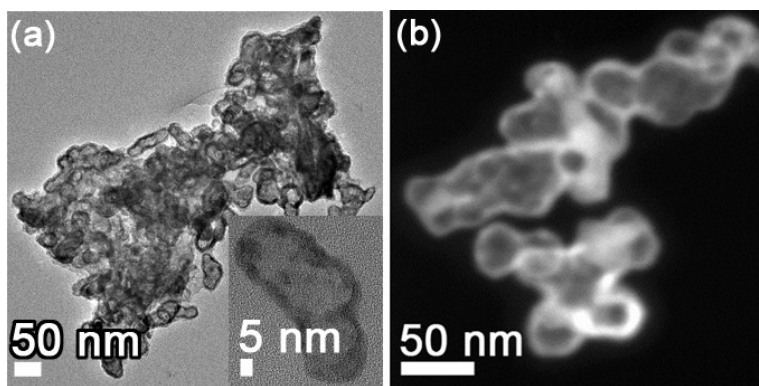

**Figure S9.** Representative TEM images of  $\text{Co}_3\text{Se}_4$  nanocrystals after the silylative deoxygenation of  $\text{Co}_3\text{O}_4$  with  $\text{TMS}_2\text{Se}$ ; (a) shows a high magnification image of one particle with hollow morphology; (b) shows an HAADF-STEM image.

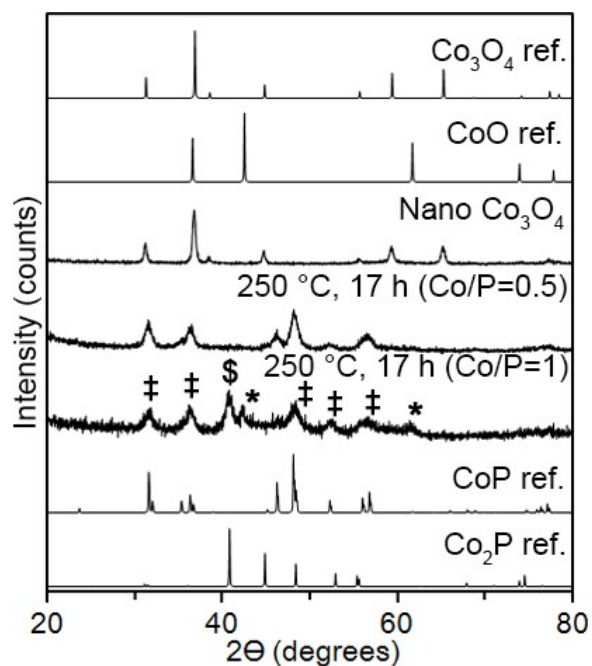

**Figure S10.** Powder XRD patterns of CoO nanocrystals and their silylative deoxygenation product upon reaction with  $\text{TMS}_3\text{P}$ . Reported XRD patterns for bulk rock salt CoO (\*), MnP-type CoP (‡), and MnP-type  $\text{Co}_2\text{P}$  (\$) are shown for comparison. Also shown is the synthetic Co/P ratio, determined by dividing three times the chemical amount (in moles) of  $\text{Co}_3\text{O}_4$  over that of  $\text{TMS}_3\text{P}$ .

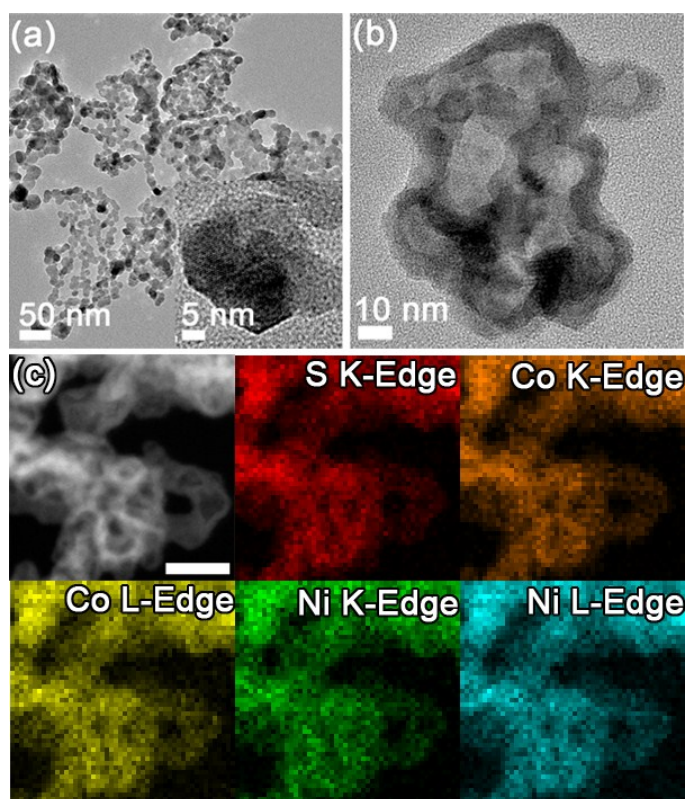

**Figure S11.** Representative TEM (a, b), and registered HAADF-STEM/EDS images (c) of  $\text{NiCo}_2\text{O}_4$  nanocrystals (a) and the silylative deoxygenation product with  $\text{TMS}_2\text{S}$  (b, c). The scale bar in c corresponds to 50 nm.



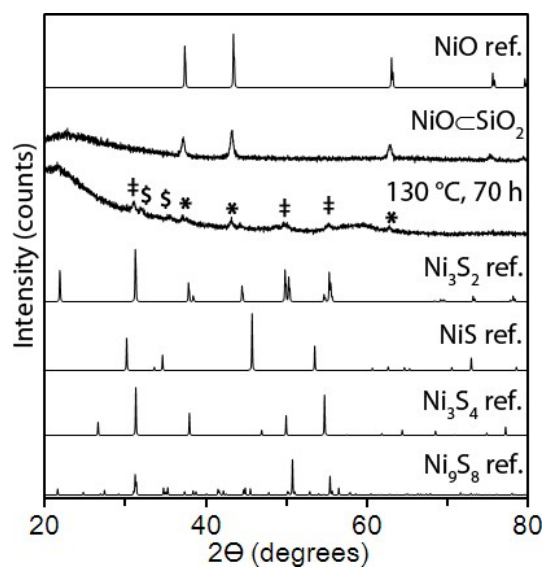

**Figure S12.** Powder XRD data for silylative deoxygenation of  $\text{NiO}/\text{SiO}_2$  with  $\text{TMS}_2\text{S}$ , product and bulk references (\* =  $\text{NiO}$ , ‡ =  $\text{Ni}_3\text{S}_2$ , \$ =  $\text{Ni}_9\text{S}_8$ ).

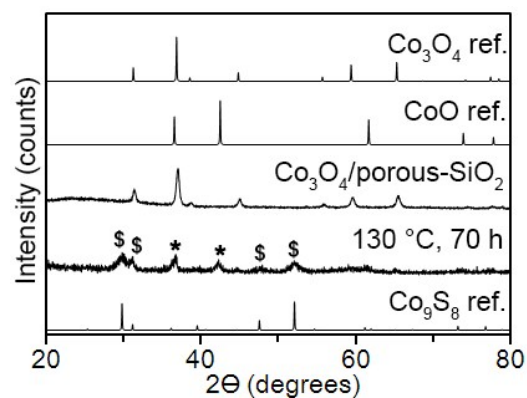

**Figure S13.** UV-Vis absorption spectra of aliquots during the silylative deoxygenation of  $\text{Co}_3\text{O}_4/\text{porous-SiO}_2$  with  $\text{TMS}_2\text{S}$  (a) and powder XRD data for  $\text{Co}_3\text{O}_4/\text{porous-SiO}_2$ , product and bulk references (\* =  $\text{CoO}$ , \$ =  $\text{Co}_9\text{S}_8$ ).

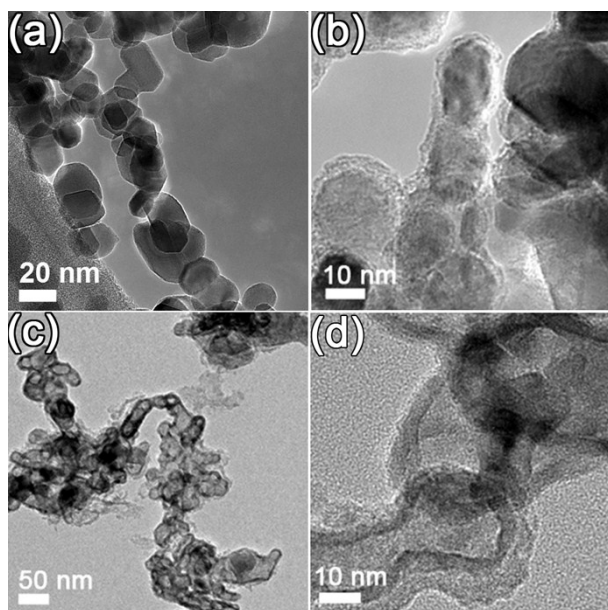

**Figure S14.** Representative TEM images of  $\text{Co}_3\text{O}_4$  (a),  $\text{Co}_3\text{O}_4/\text{porous-SiO}_2$  (3 nm-thick shell) (b), and its silylative deoxygenation product with  $\text{TMS}_2\text{S}$ ,  $\text{Co}_9\text{S}_8/\text{SiO}_2$  (c, d).

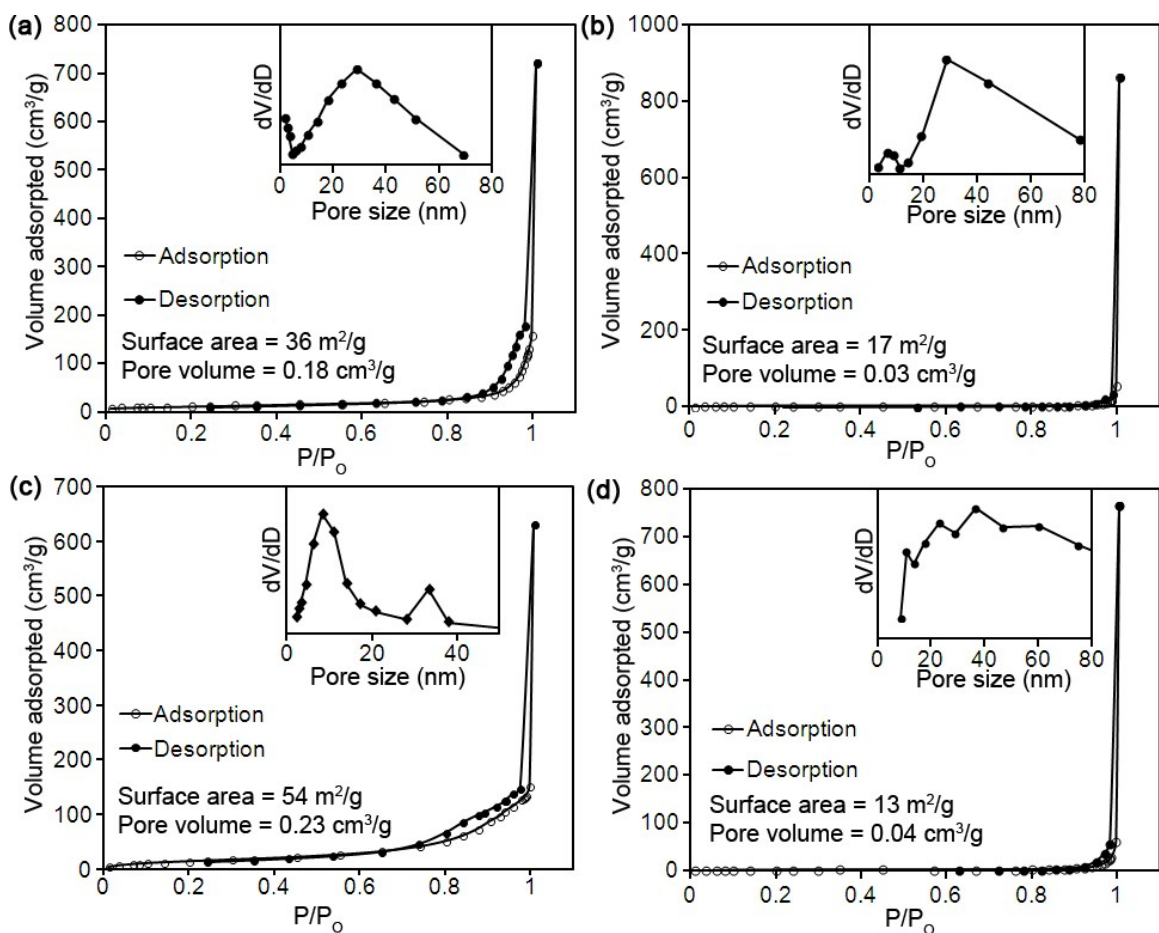

**Figure S15.** Nitrogen physisorption isotherms and BJH pore size distributions of NiO (a), Ni<sub>3</sub>S<sub>2</sub> (b), CoO (c) and Co<sub>9</sub>S<sub>8</sub> (d). The low surface area measurements indicate the resulting silica shells are not significantly porous. Introduction of a porous structure may require the use of a surfactant during the silylative deoxygenation process.
